# Supplementary material
Source: PubMed Central journal article supplement (PMC3684778)

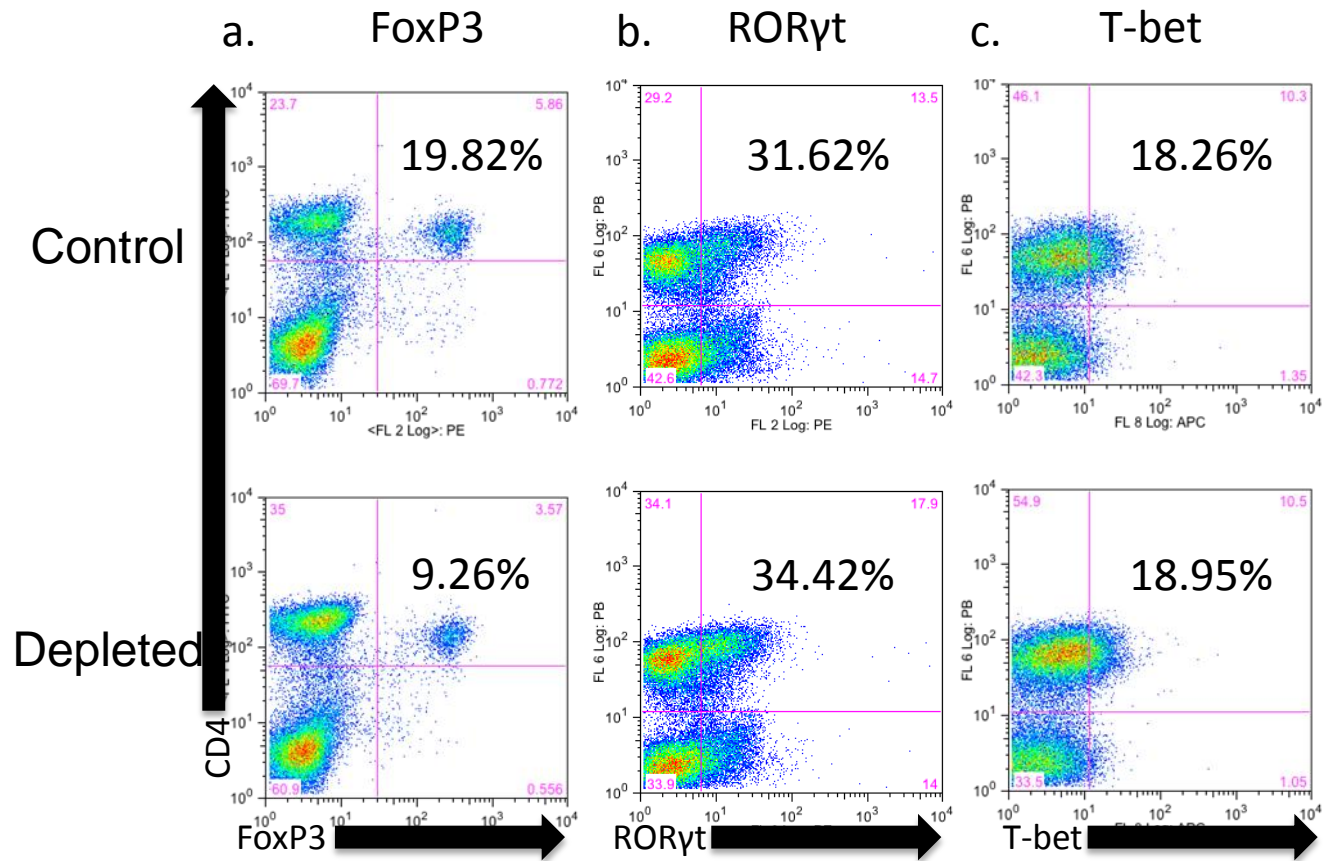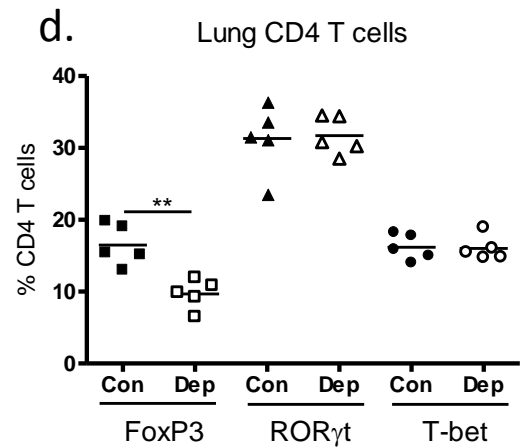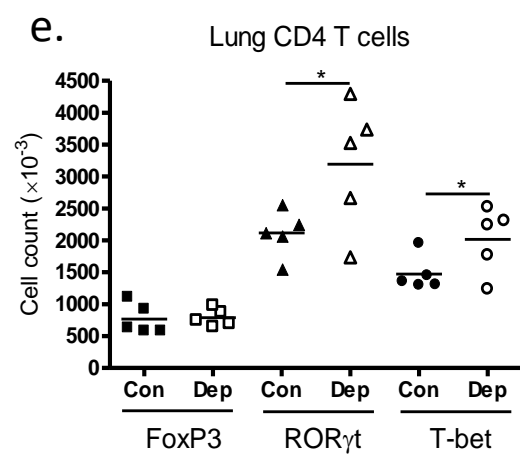

Supplementary Figure 1.

Supplement: mi2012108x1.pdf [file mi2012108x1.pdf]

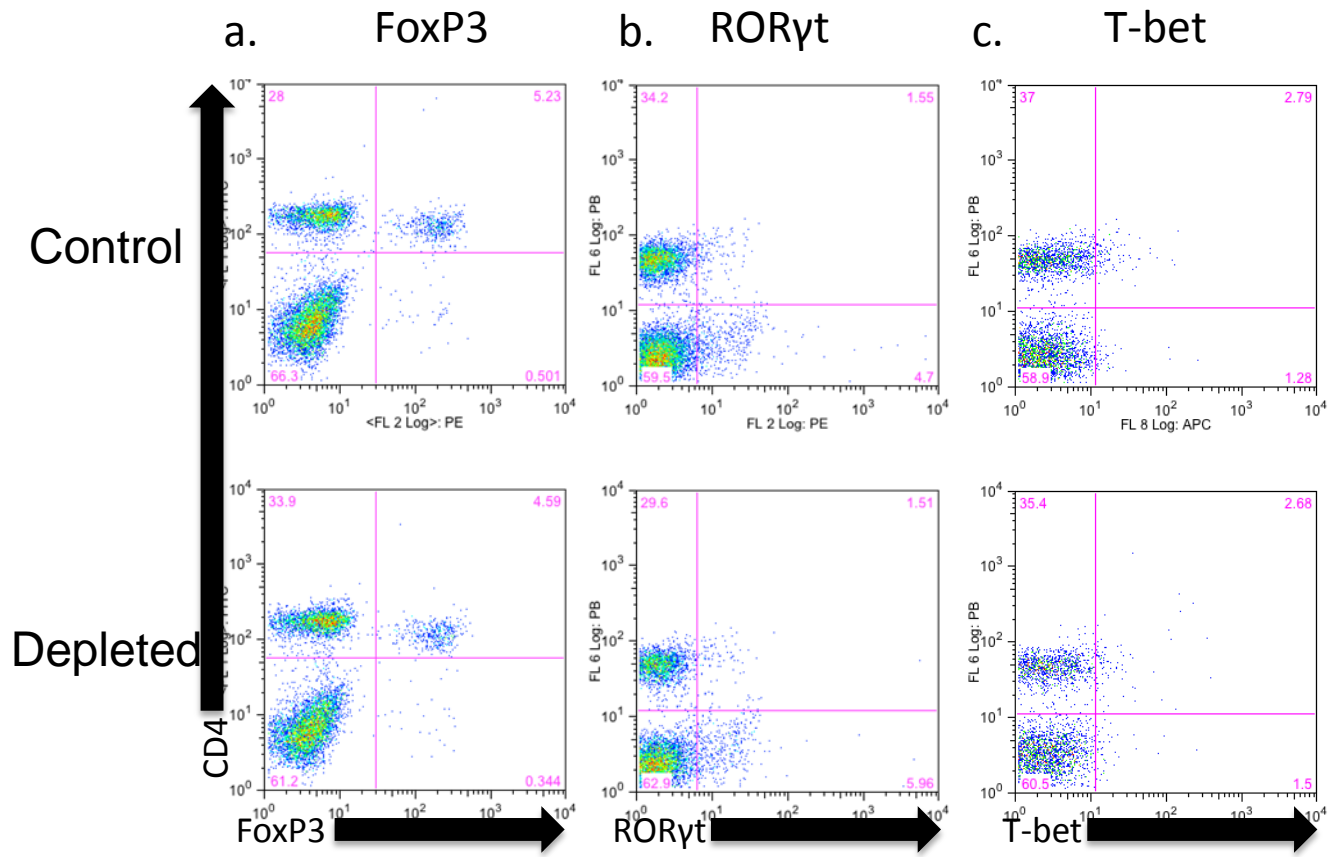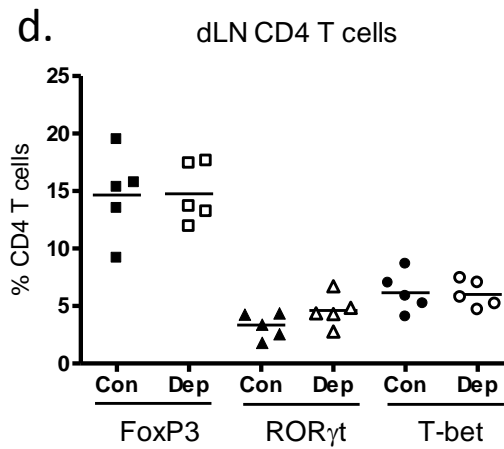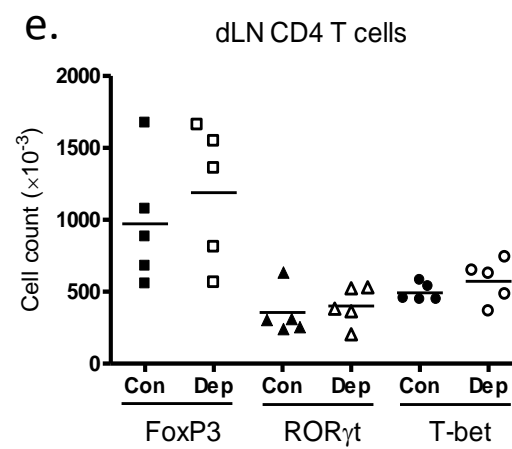

Supplementary Figure 2.

Supplement: mi2012108x2.pdf [file mi2012108x2.pdf]

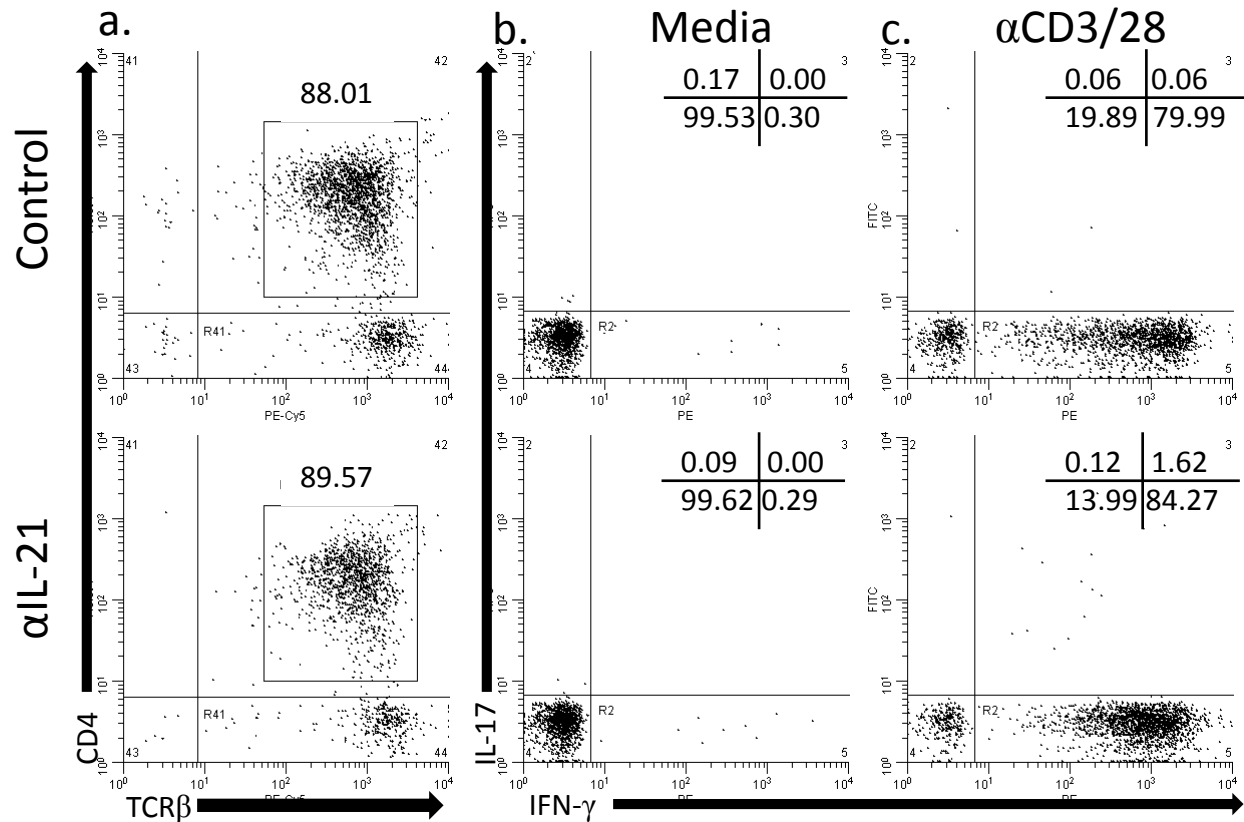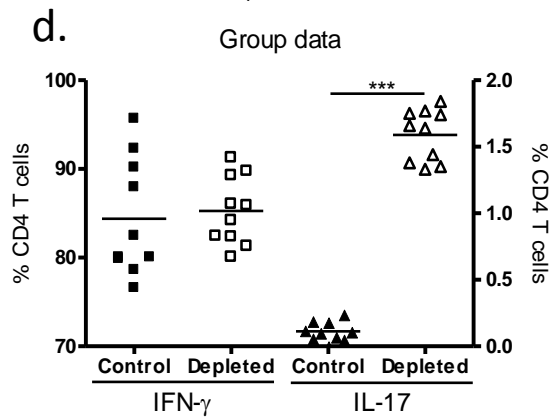

Supplementary Figure 3.

Supplement: mi2012108x3.pdf [file mi2012108x3.pdf]

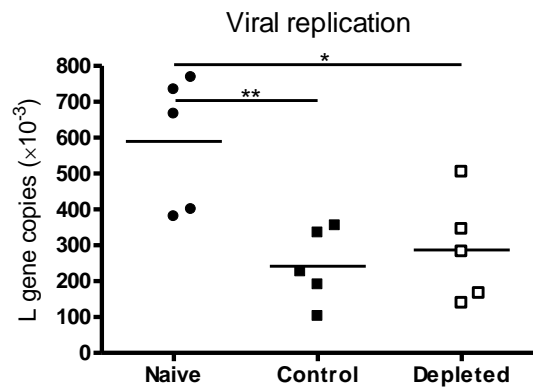

Supplementary Figure 4.

Supplement: mi2012108x4.pdf [file mi2012108x4.pdf]

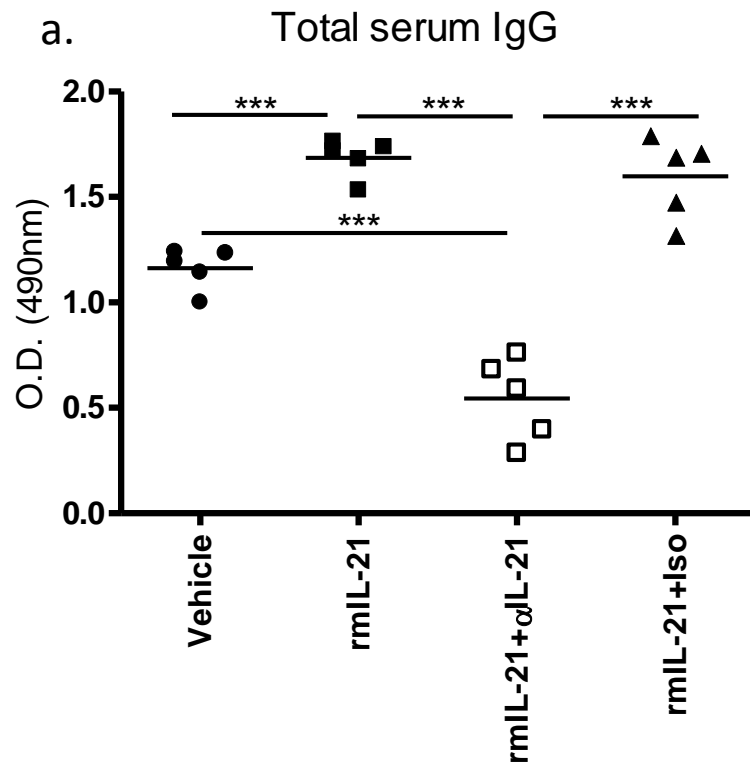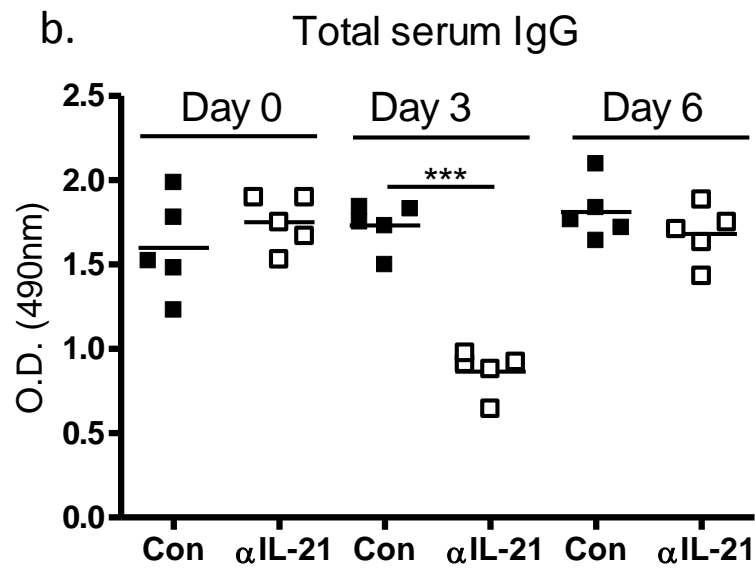

Supplementary Figure 5.

Supplement: mi2012108x5.pdf [file mi2012108x5.pdf]
